# Supplementary material
Source: publisher figshare collection journal article supplement (https://sage.figshare.com/ndownloader/files/26578316)
Supplement: Supplementary file 5 [file 26578316]

Archive with 5 entries (5 files):
- coi_disclosure-gwz.pdf
- coi_disclosure Eug Papadop.pdf
- coi_disclosure_ebert.pdf
- coi_disclosure sloane.pdf
- coi_disclosure dowling.pdf
